# Supplementary material
Source: publisher figshare collection journal article supplement (https://geolsoc.figshare.com/ndownloader/files/32591310)

### Supplemental material 3 – additional figures

**Supplemental material 3-1.** Photomicrographs (plane-polarized light; for sample FHK23 crossed polarizers) of dated samples from Biscayarhalvøya, Lernerøyane and Germaniahelvøya. (a–d) Samples from the Richarddalen Complex: Garnet amphibolite FHK45 (a–b) showing garnet with quartz inclusions and radial cracks (b), orthogneiss C6-1 (c), and banded gneiss FHK43 (d). (e–f) photomicrographs of garnet–mica schist: Sample C9-1 from Montblanc Formation (e) and sample C20-1 from Biscayarhuken Formation (f). (g) Migmatitic schist xenolith FHK15 in grey granite from the Liefdefjorden Migmatite Complex. (h) Amphibole gneiss xenolith FHK17 from the Liefdefjorden Migmatite Complex. (i) Mica schist FHK11+12 from the Lernerøyane Group. (j) Leucogranitic segregation FHK23 from the Liefdefjorden Migmatite Complex. Ap – apatite, Bt – biotite, Chl – chlorite, Czo – clinozoisite, Fsp – feldspar, Grt – garnet, Hbl – hornblende, Ms – muscovite, Opq – opaque minerals, Pl – plagioclase, Qz – quartz, Rt – rutile, St – staurolite, Ttn – titanite. Mineral abbreviations from Whitney & Evans (2010). See Figs. 4 and 5 for outcrop and sample locations.



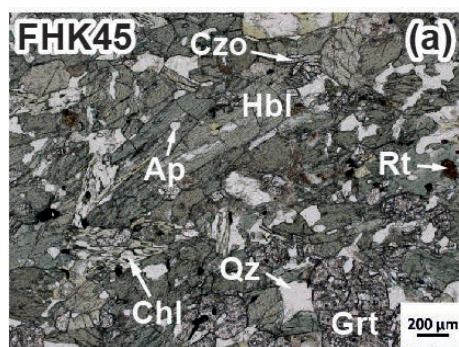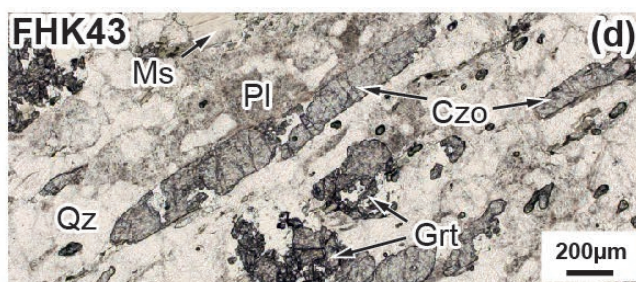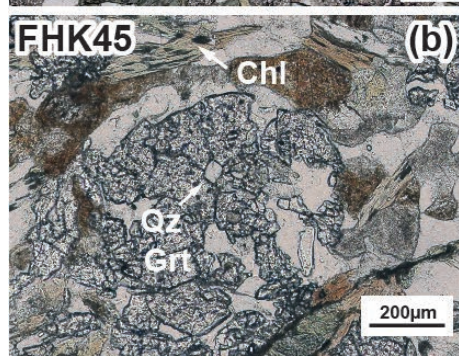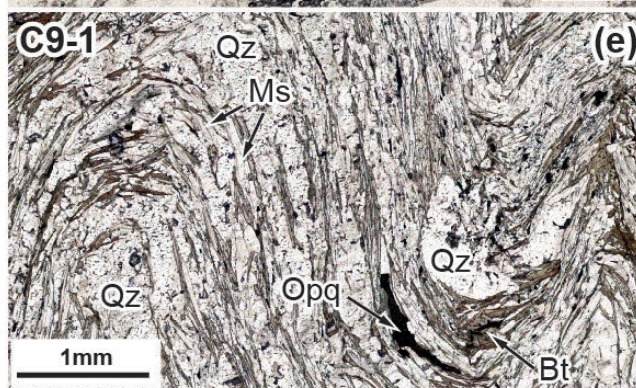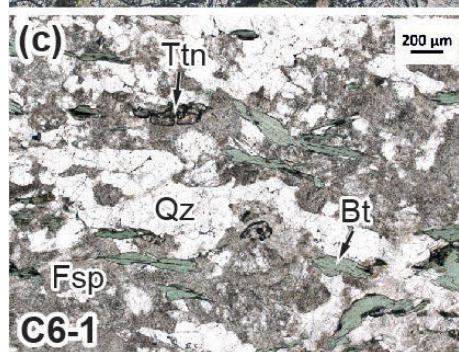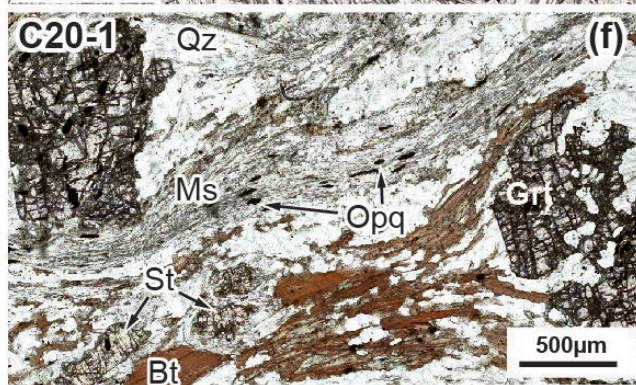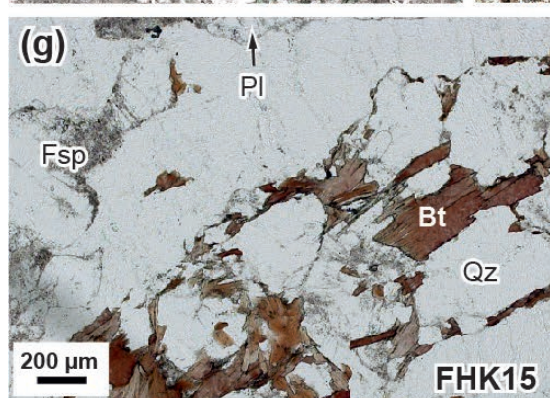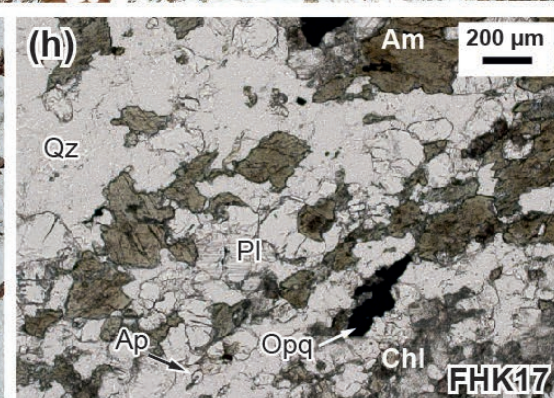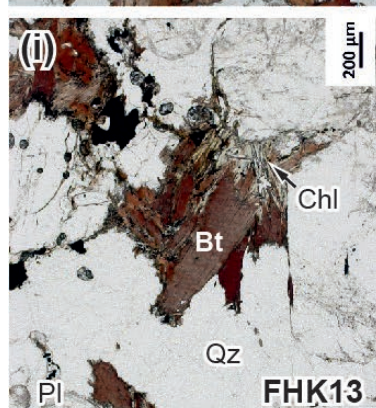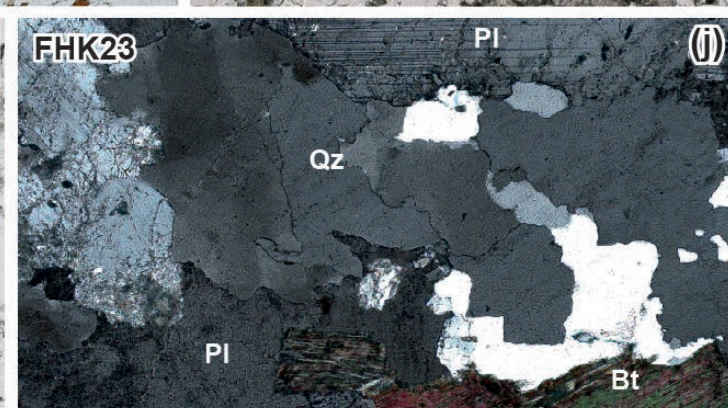

Supplement: Supplementary file 1 [file 32591310]
